# Supplementary material
Source: PubMed Central journal article supplement (PMC6761013)
Supplement: NIHMS1536404-supplement-1.pdf [file NIHMS1536404-supplement-1.pdf]

# Figure S1

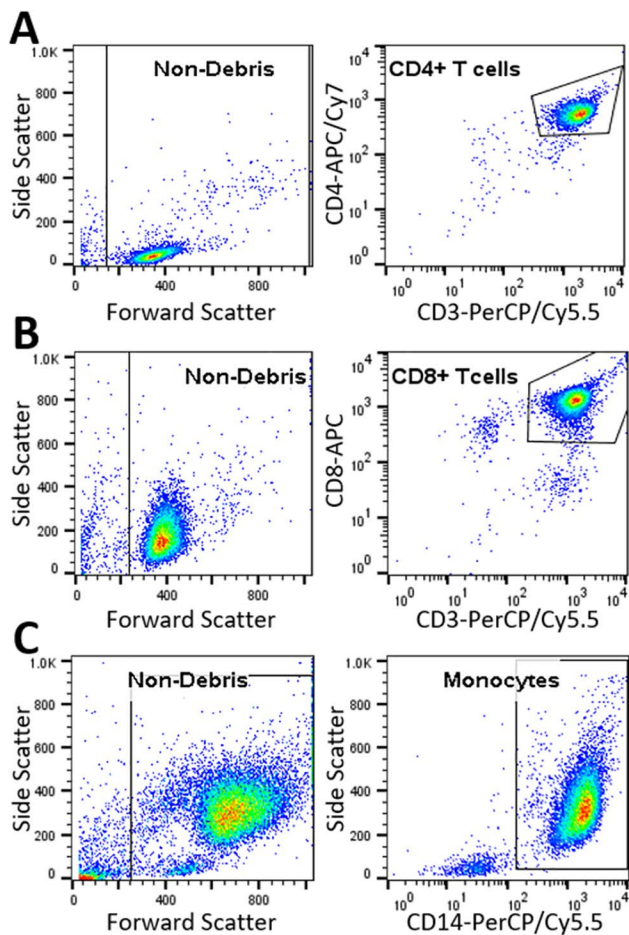

**Fig. S1.** Purity analysis of enriched cells: Gating strategy shown for CD4+ T cells (A.), CD8+ T cells (B.) and Monocytes (C.). First, debris was gated out on Forward and Side scatter, then non-debris was examined for (A.) CD3 and CD4, (B.) CD3 and CD8, or (C.) CD14 and Side scatter. D. The expression of cell-type specific markers in CD4+, CD8+ and CD14+ samples. The RNA expression patterns of cell-type specific markers overall strongly agrees with the corresponding cell type. Eight samples present as outliers for the marker expressions and show potential evidence of cross-contamination or mis-labeling, and were excluded from downstream analysis.

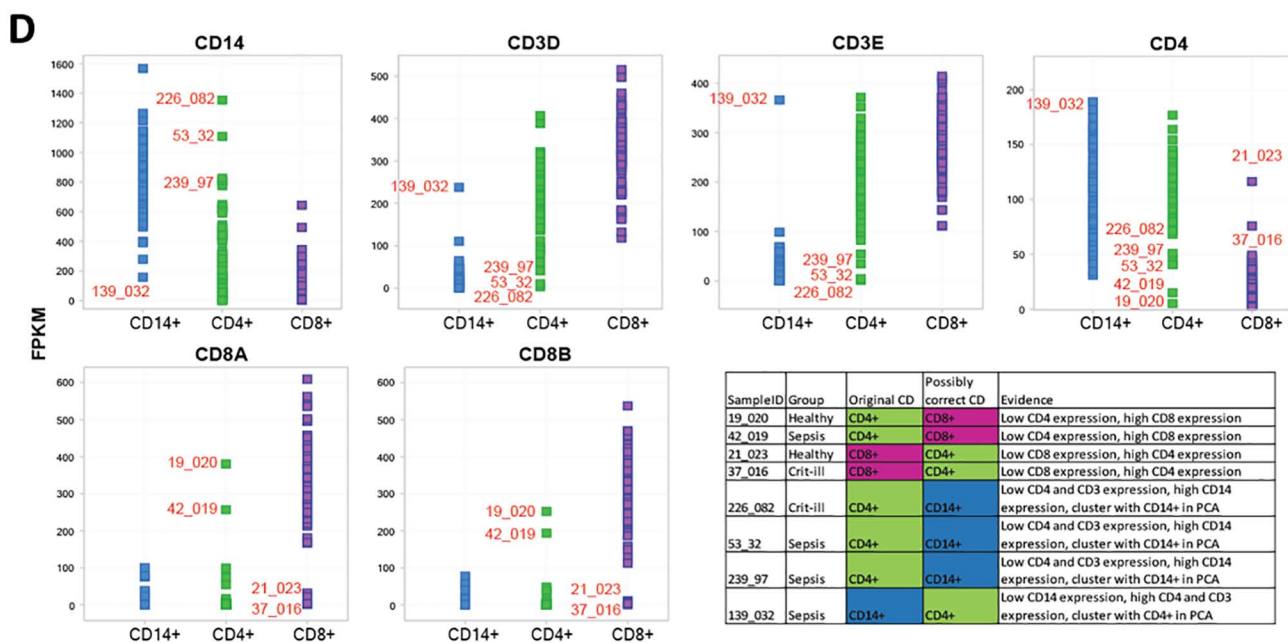

| SampleID | Group    | Original CD | Possibly correct CD | Evidence                                                                    |
|----------|----------|-------------|---------------------|-----------------------------------------------------------------------------|
| 19_020   | Healthy  | CD4+        | CD8+                | Low CD4 expression, high CD8 expression                                     |
| 42_019   | Sepsis   | CD4+        | CD8+                | Low CD4 expression, high CD8 expression                                     |
| 21_023   | Healthy  | CD8+        | CD4+                | Low CD8 expression, high CD4 expression                                     |
| 37_016   | Crit-ill | CD8+        | CD4+                | Low CD8 expression, high CD4 expression                                     |
| 226_082  | Crit-ill | CD4+        | CD14+               | Low CD4 and CD3 expression, high CD14 expression, cluster with CD14+ in PCA |
| 53_32    | Sepsis   | CD4+        | CD14+               | Low CD4 and CD3 expression, high CD14 expression, cluster with CD14+ in PCA |
| 239_97   | Sepsis   | CD4+        | CD14+               | Low CD4 and CD3 expression, high CD14 expression, cluster with CD14+ in PCA |
| 139_032  | Sepsis   | CD14+       | CD4+                | Low CD14 expression, high CD4 and CD3 expression, cluster with CD4+ in PCA  |

# Figure S2

## A

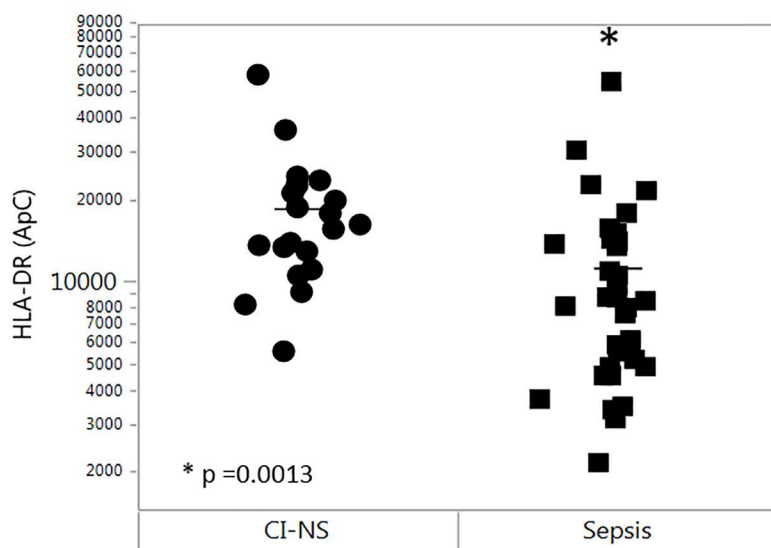

## B

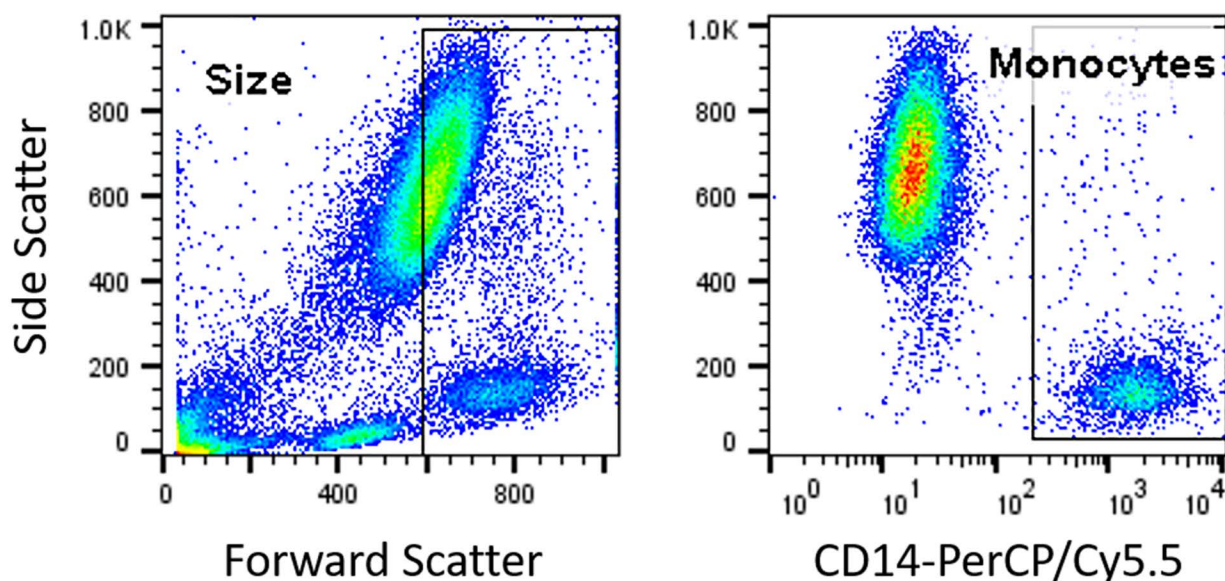

**Fig. S2.** Surface HLA-DR levels on monocytes: **A.** Surface HLA-DR levels on the monocytes of sepsis patients was significantly lower than that of CINS patients. **B.** Gating strategy for monocyte HLA-DR measurement. A rough monocyte gate was drawn on a Forward Scatter x Side Scatter plot, events inside the initial gate were then gated for monocyte positivity in the PerCP/Cy5.5 channel per manufacturer's instructions, events from this gate were considered monocytes. GMFI of this population was recorded for the monocyte population and this GMFI was compared against a standard curve derived from a concurrent run of BD Quantibrite beads. The result of this comparison is a value defined, by the manufacturers, as antibodies per cell (ApC).



**Figure S3**

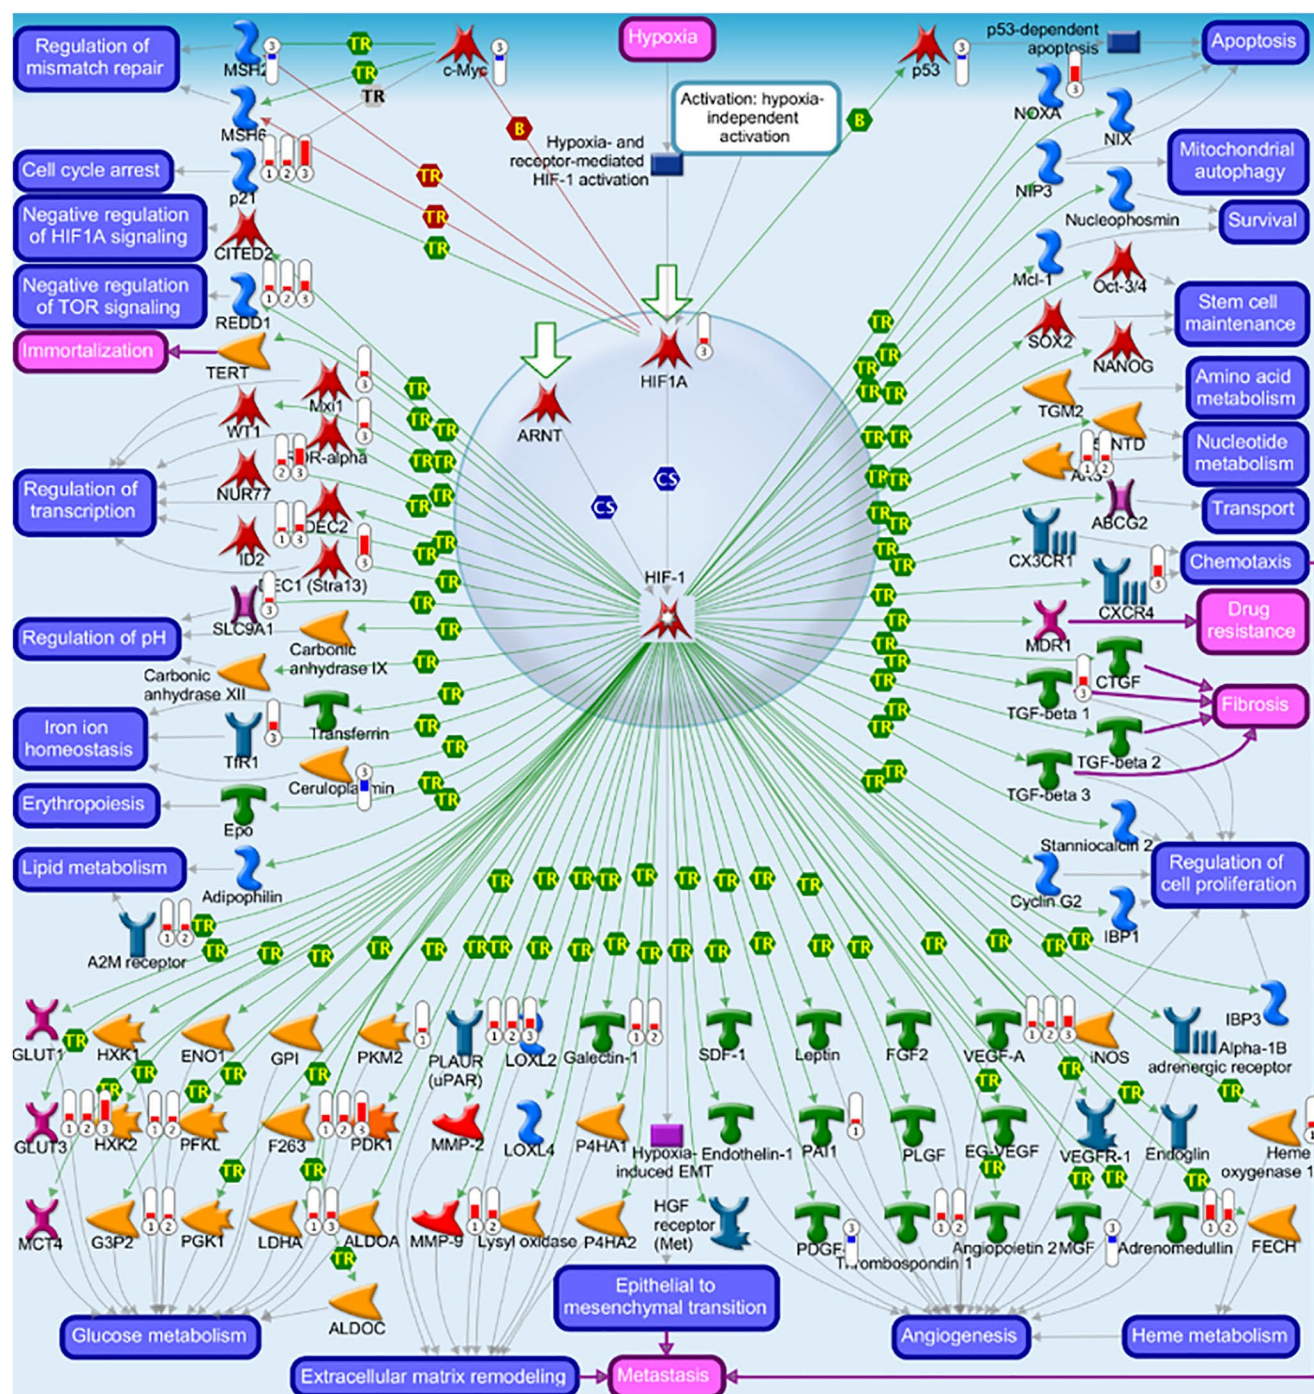

- ① Up CD4 Sepsis vs Healthy
- ② Up CD4 Crit-ill vs Healthy
- ③ Up CD4 Cancer vs Healthy
- ① Down CD4 Sepsis vs Healthy
- ② Down CD4 Crit-ill vs Healthy
- ③ Down CD4 Cancer vs Healthy

**Fig. S3.** *HIF-1 $\alpha$*  response pathway: Downstream targets of HIF-1 $\alpha$  were upregulated in all samples from all disease types. Here, bubbles indicate which downstream targets showed differential expression in various disease states. Numbers within them represent the patient population in which they were differentially expressed (1=Sepsis, 2=CINS, 3=Cancer). Blue colored bubbles represent downregulated genes while red colored bubbles represent upregulated genes. The amount of fill in the bubble indicates relative degree of altered expression, minimum 1.2 [FC].
